# Supplementary material for: Caregiver Depressive Symptoms Associated with Behavioral and Emotional Problems in Preschoolers
Source: Springer Nature journal article supplement (doi:10.1007/s10826-019-01573-8), 2019-09-21
Supplement: MOESM1 [file 17196306]

|  | Caregivers without depressive symptoms  N=2563 | Caregivers with depressive symptoms  N=82 | Total |
| --- | --- | --- | --- |
| Total child ECSA <18 (normal) | 2278 | 36 | 2314 |
| Total child ECSA >=18 (positive) | 285 | 46 | 331 |

**Possible supplemental Table. – Relationship between Caregiver depressive symptoms and Total Child score on the Early Childhood Screening Assessment (ECSA)**
